# Supplementary material for: Hsa_circ_0000098 is a novel therapeutic target that promotes hepatocellular carcinoma development and resistance to doxorubicin
Source: PubMed Central journal article supplement (PMC9450443; doi:10.1186/s13046-022-02482-3), 2022-09-07

**A**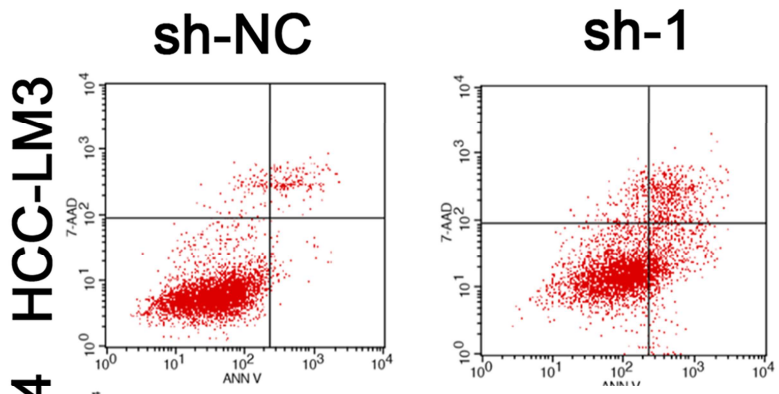**B**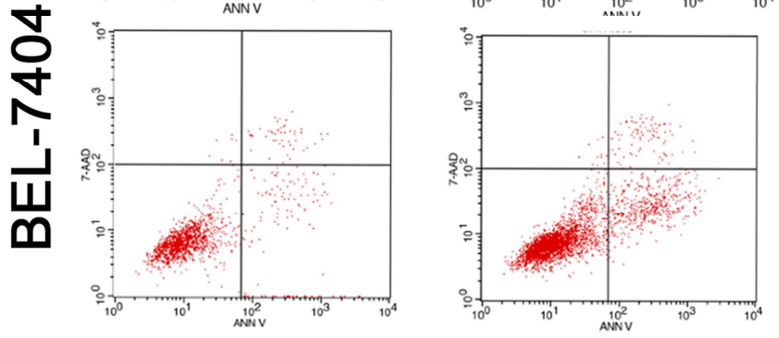**C**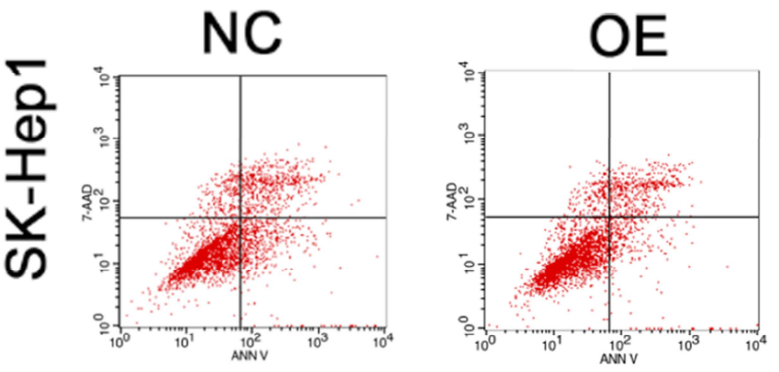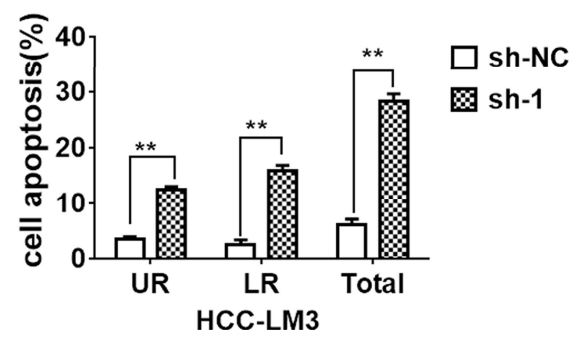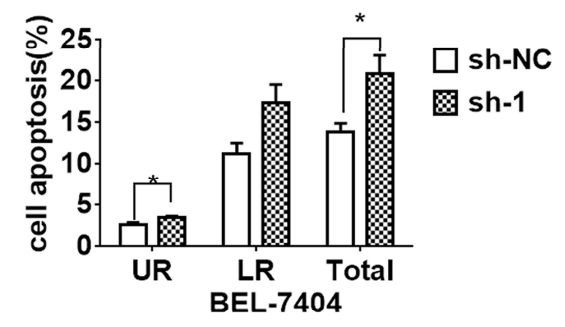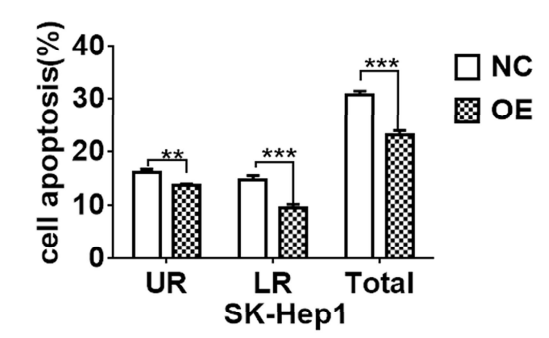

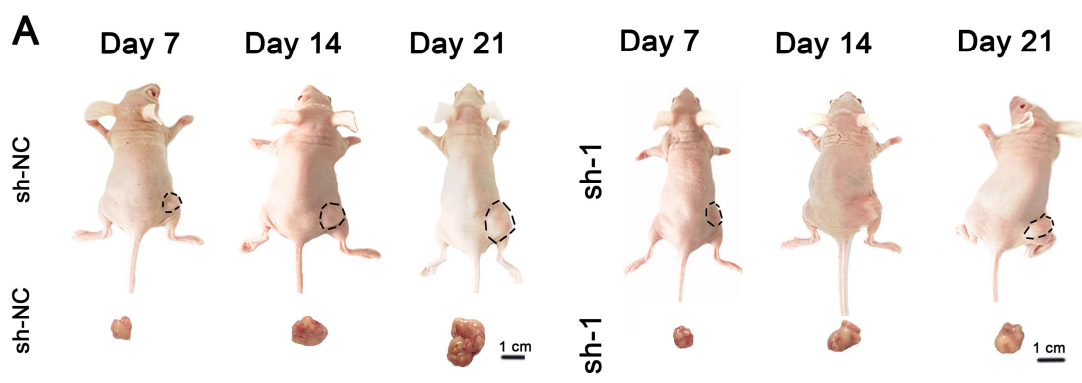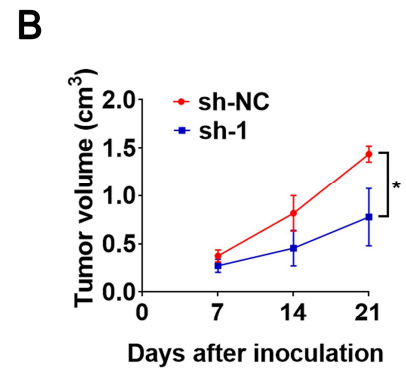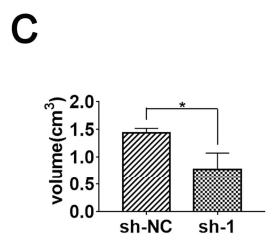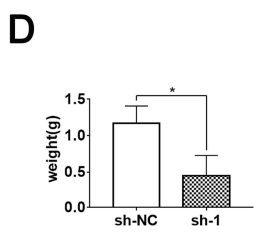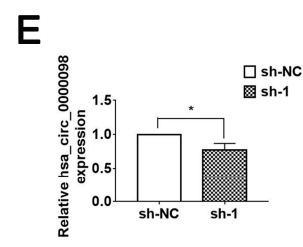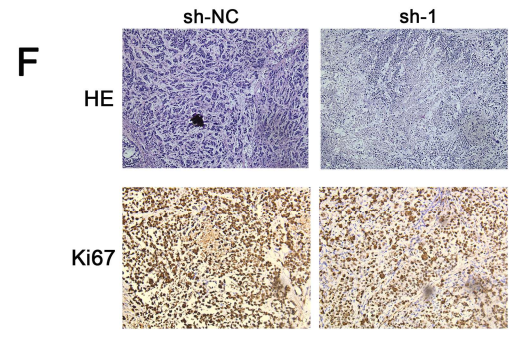

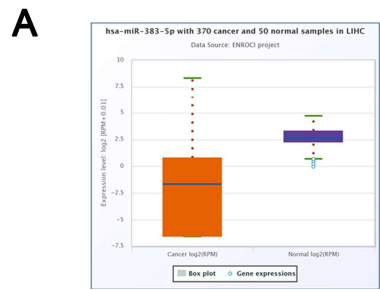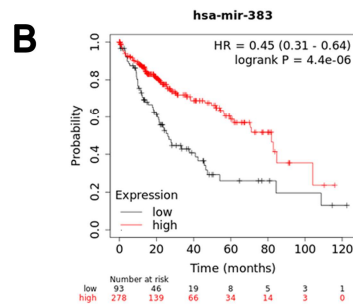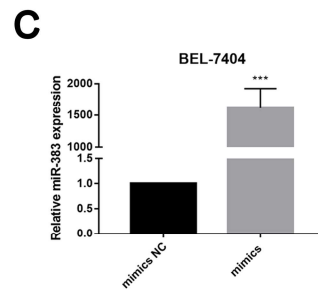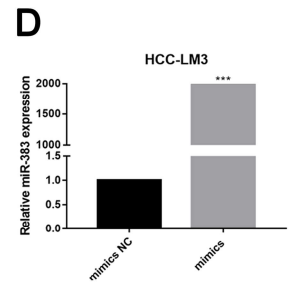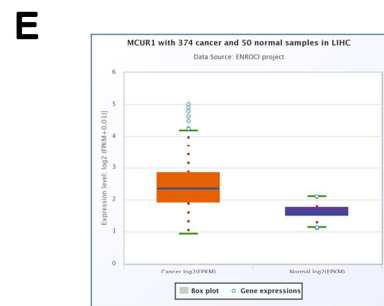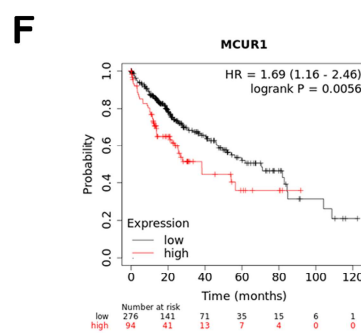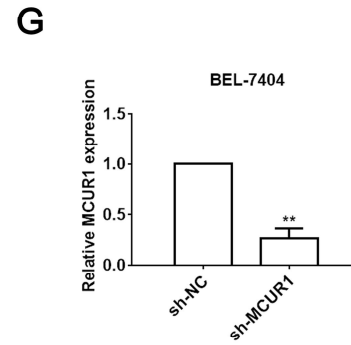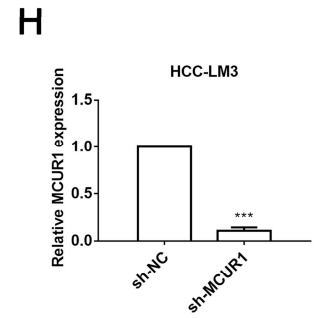

**A**

| pathwayName                                   | ↕ | log10(pval) |
|-----------------------------------------------|---|-------------|
| KEGG_Pathways_In_Cancer                       | ↑ | -5.555791   |
| KEGG_Regulation_Of_Actin_Cytoskeleton         |   | -3.55793    |
| KEGG_Renal_Cell_Carcinoma                     |   | -3.61839    |
| KEGG_P53_Signaling_Pathway                    |   | -3.69142    |
| KEGG_Focal_Adhesion                           |   | -3.78243    |
| KEGG_Vasopressin_Regulated_Water_Reabsorption |   | -3.40194    |
| KEGG_Fc_Gamma_R_Mediated_Phagocytosis         |   | -3.86731    |
| KEGG_Pancreatic_Cancer                        |   | -3.09634    |
| KEGG_Chronic_Myeloid_Leukemia                 |   | -2.90887    |
| KEGG_Glioma                                   |   | -2.91483    |
| KEGG_Endocytosis                              | ↑ | -2.738511   |
| KEGG_Gnrh_Signaling_Pathway                   |   | -2.74670    |
| KEGG_Neurotrophin_Signaling_Pathway           |   | -2.43671    |

**B**

| pathwayName                                                 | ↕ | log10(pval) |
|-------------------------------------------------------------|---|-------------|
| GO_Activation_Of_Gtpase_Activity                            | ↑ | -3.277011   |
| GO_Adherens_Junction_Assembly                               |   | -3.07185    |
| GO_Alpha_Beta_T_Cell_Differentiation                        |   | -2.71895    |
| GO_Anatomical_Structure_Formation_Involved_In_Morphogenesis |   | -3.46456    |
| GO_Camp_Mediated_Signaling                                  |   | -2.78799    |
| GO_Cell_Cycle                                               |   | -4.45041    |
| GO_Cell_Cycle_Checkpoint                                    |   | -4.07137    |
| GO_Cell_Cycle_Process                                       |   | -3.26651    |
| GO_Cell_Death                                               |   | -3.12568    |

**A**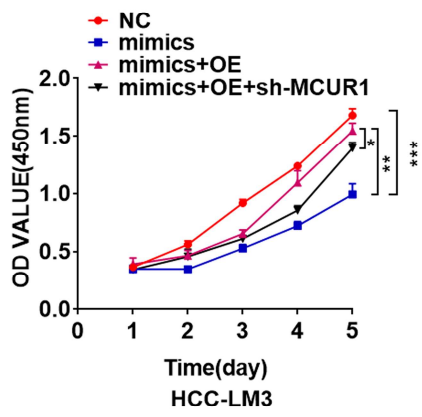**B**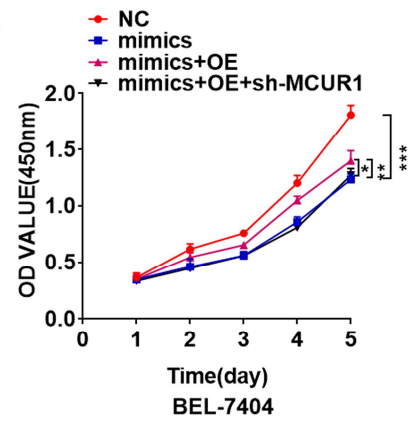

**A**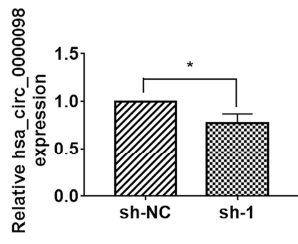**B**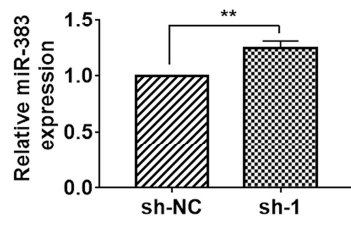**C**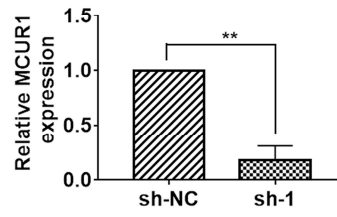**D**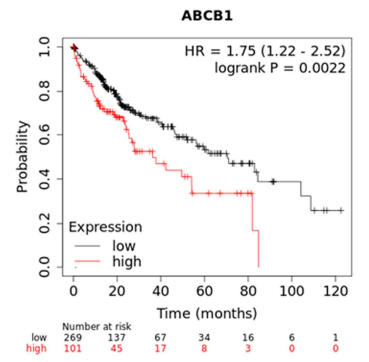

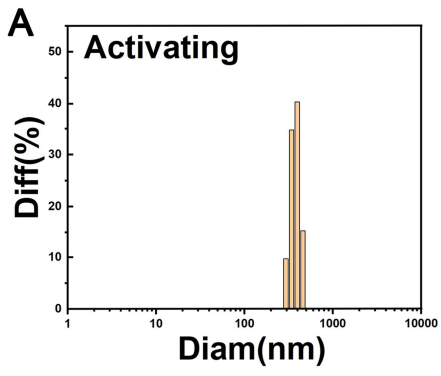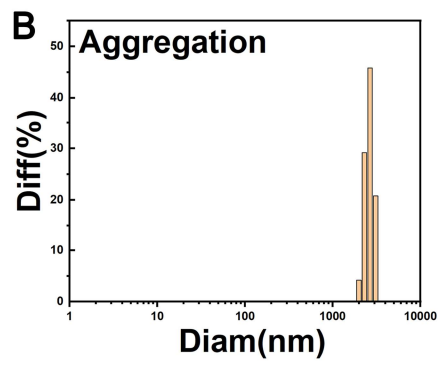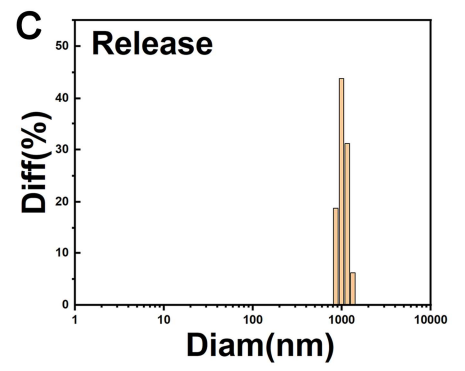

**A**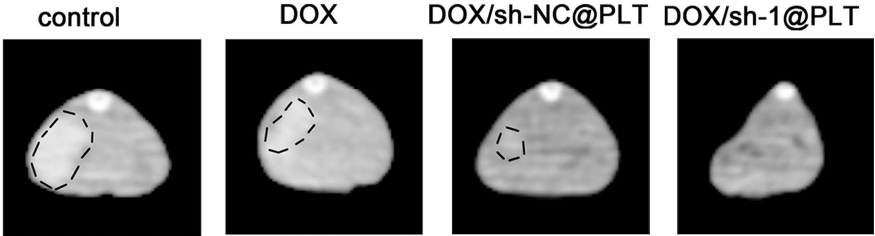**B**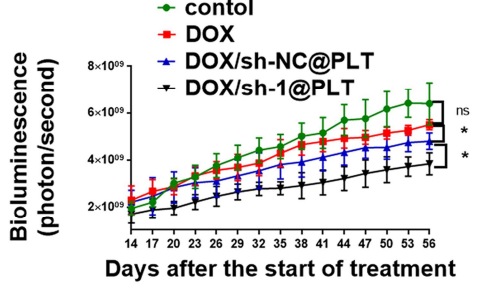**C**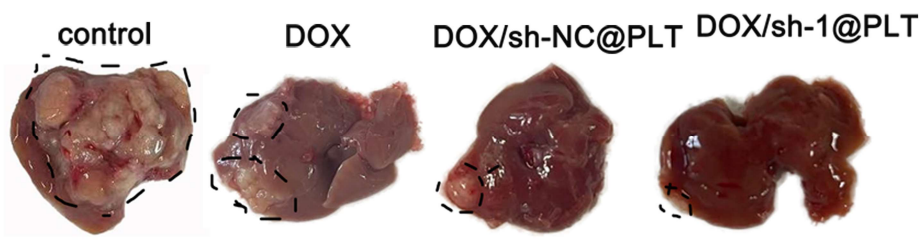**D**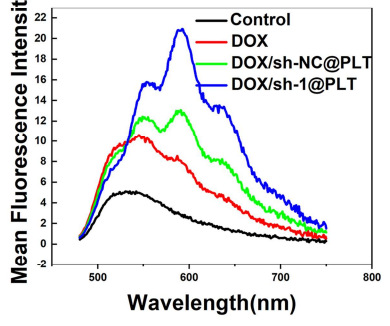

Supplement: 13046_2022_2482_MOESM1_ESM.pdf [file 13046_2022_2482_MOESM1_ESM.pdf]
